# Supplementary material for: The global long-term microwave Vegetation Optical Depth Climate Archive (VODCA)
Source: Copernicus journal article supplement (doi:10.5194/essd-12-177-2020), 2020-01-30
Supplement: Supplementary file [file essd-12-177-2020-supplement.pdf]

Supplement of Earth Syst. Sci. Data, 12, 177–196, 2020  
<https://doi.org/10.5194/essd-12-177-2020-supplement>  
© Author(s) 2020. This work is distributed under  
the Creative Commons Attribution 4.0 License.

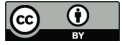

Open Access  
Earth System  
Science  
Data

*Supplement of*

## **The global long-term microwave Vegetation Optical Depth Climate Archive (VODCA)**

**Leander Moesinger et al.**

*Correspondence to:* Leander Moesinger (leander.moesinger@geo.tuwien.ac.at, vodca@geo.tuwien.ac.at)

The copyright of individual parts of the supplement might differ from the CC BY 4.0 License.

## 1 Description of data variables & summary of flags

Here all the variables in the netcdf files are described, as well as a short summary of all flags. Most of this information is also in the metadata.

- **VOD:** Unitless, Vegetation Optical Depth of the respective band
- 5 - **sensor\_flag:** Bit-flag indicating which sensors contributed to each observation.
  - 1 = AMSR-E
  - 2 = AMSR2
  - 3 = SSM/I F8
  - 4 = SSM/I F11
  - 10 - 5 = SSM/I F13
  - 6 = TMI
  - 7 = WindSat
- **processing\_flag:** Bit-flag indicating irregularities during processing affecting the quality of the VOD values

**Table 1.** Summary of all quality bit-flags indicating irregular processing. For more details see the referenced section. Currently only C-band VODCA is sometimes processed in a non standard way, for the Ku- and X-band they are always zero, indicating that everything was processed in in the standard way

| Bit | Section | Short description                                         | Potential spatial occurrence       | Reduction of quality                                            |
|-----|---------|-----------------------------------------------------------|------------------------------------|-----------------------------------------------------------------|
| 10  | 3.1     | AMSR-2 7.3 GHz band is used instead of 6.9 GHz            | Global, usually high RFI areas     | Very small                                                      |
| 11  | 3.2.4   | Sensor is scaled to matched TMI instead of AMSR-E         | 35°S - 35°N                        | Small                                                           |
| 12  | 3.2.4   | Sensor scaled without temporally overlapping observations | Global, mostly outside 35°S - 35°N | Possibly very large if the years 2010-2014 were very irregular. |

- **time/lon/lat:** Dimensions of the data.

## 15 2 Supplementary figures

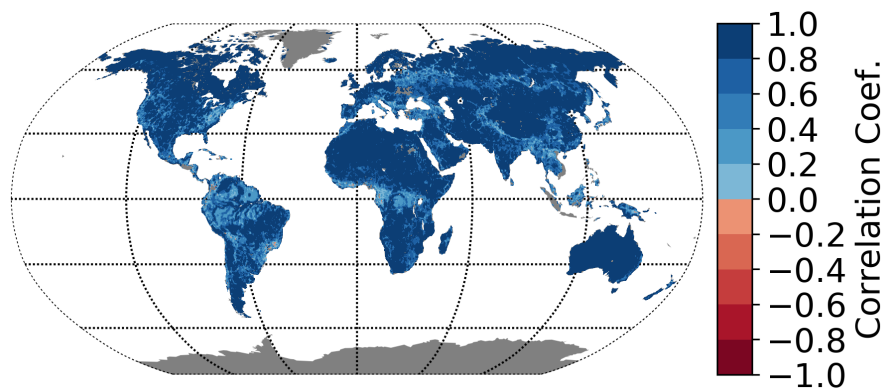

**Figure 1.** Correlation between the AMSR2 6.9 and 7.3 GHz band

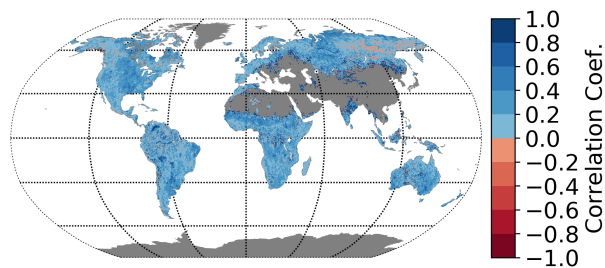

(a) L-band LPRM-SMAP vs. LPRM-SMOS

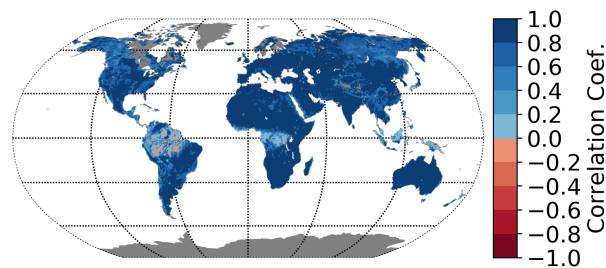

(b) Ku-band AMSR-E vs. WindSat

**Figure 2.** Correlations between different sensors of the same band. The Ku-band WindSat vs. AMSR-E plot is similar to all other sensor combinations in the Ku, X, and C band.

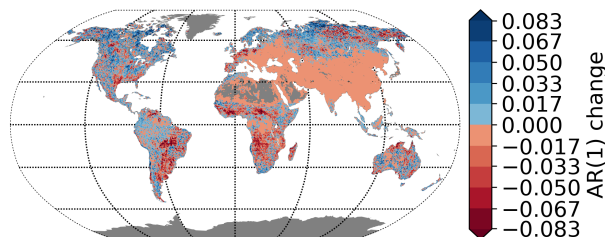

(a) SMAP

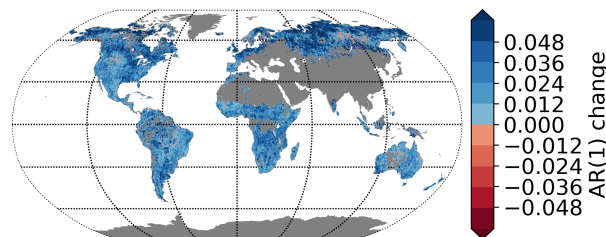

(b) SMOS

**Figure 3.** First-order auto-correlation change due to experimental merging of L-band data for each sensor

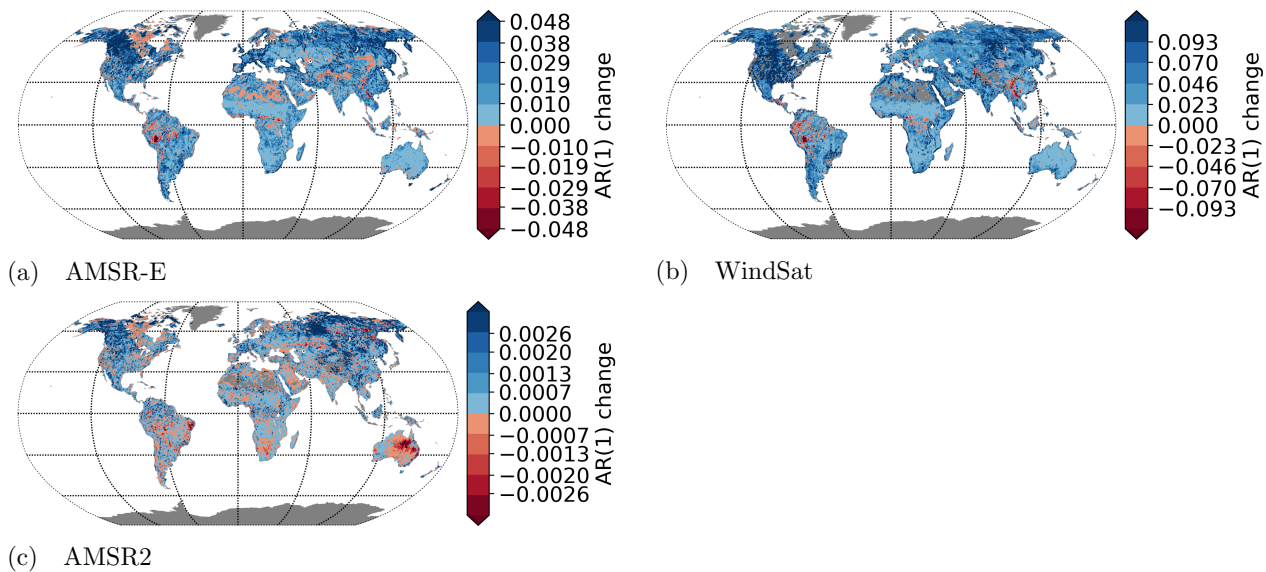

**Figure 4.** First-order auto-correlation change due to merging of C-band data for each sensor

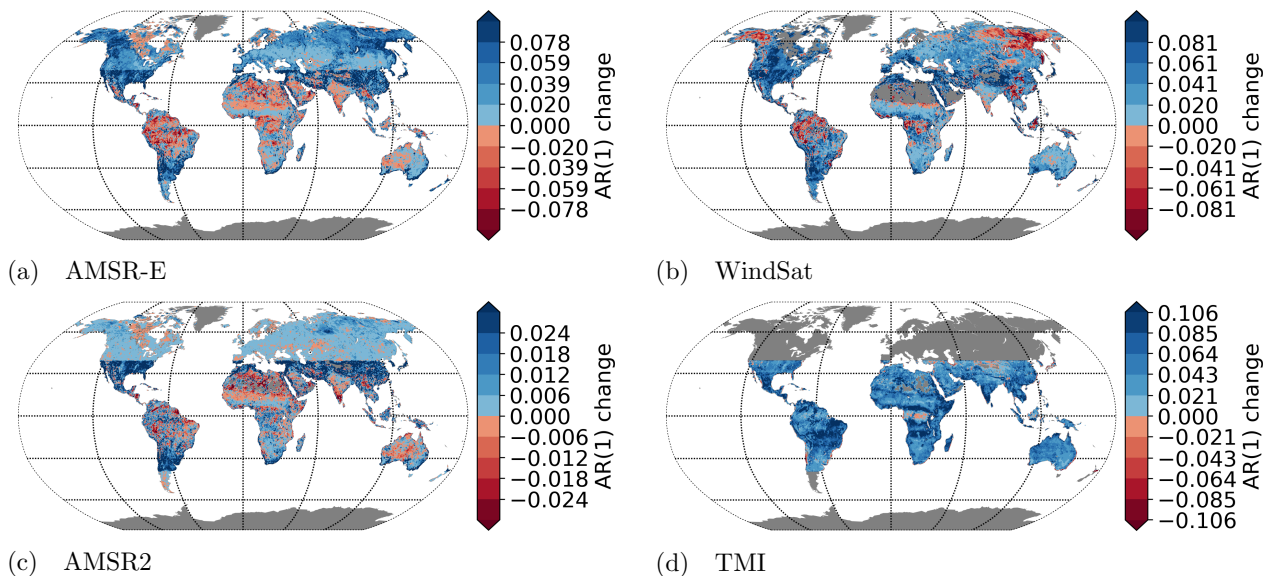

**Figure 5.** First-order auto-correlation change due to merging of X-band data for each sensor

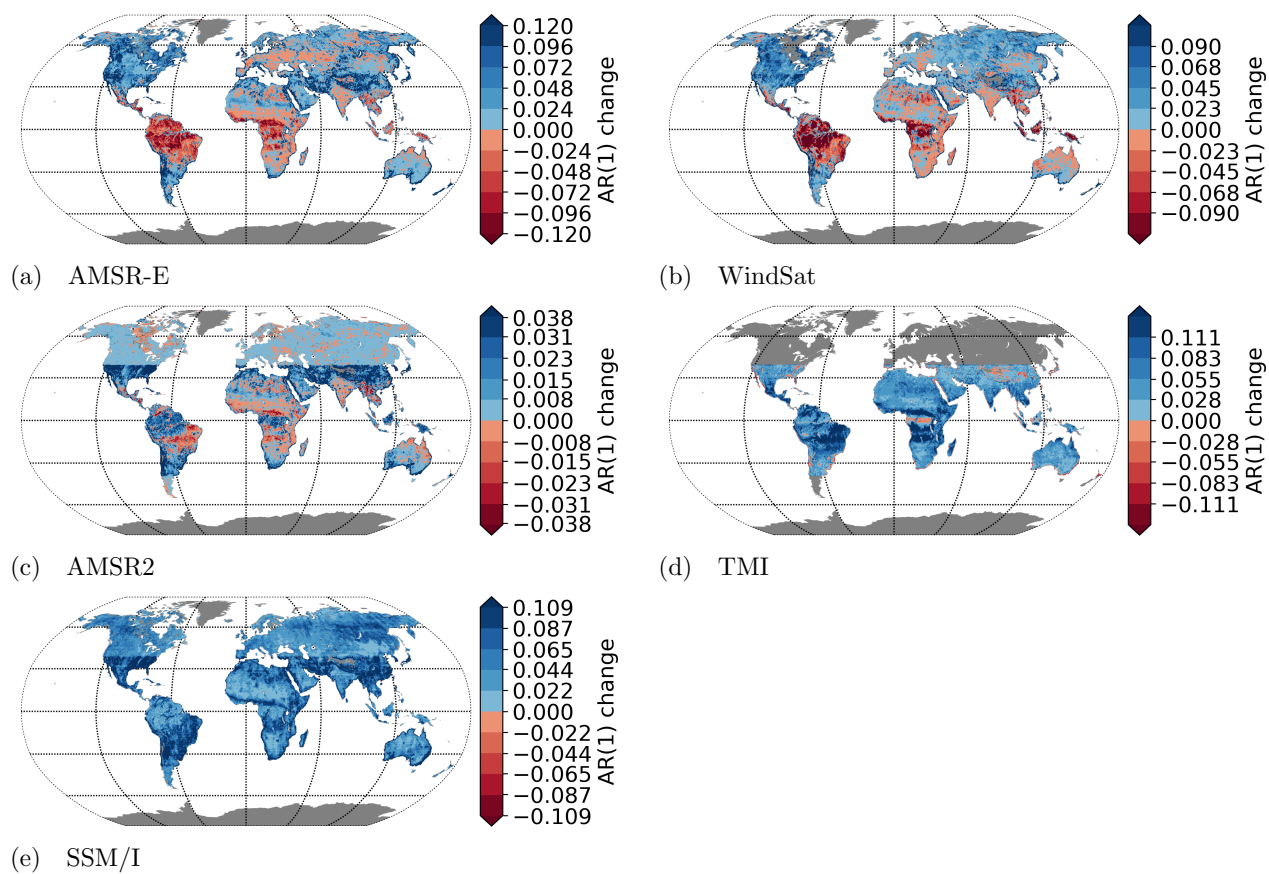

**Figure 6.** First-order auto-correlation change due to merging of Ku-band data for each sensor

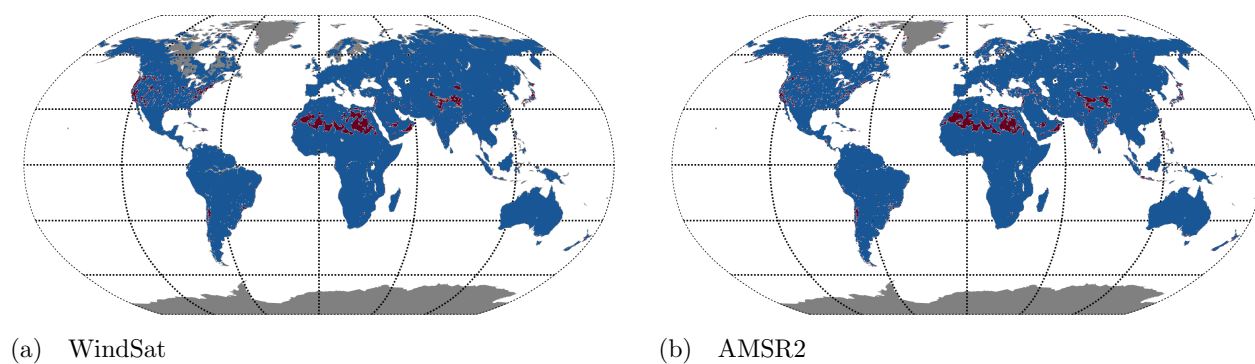

**Figure 7.** C-band data loss due to failed CDF matching

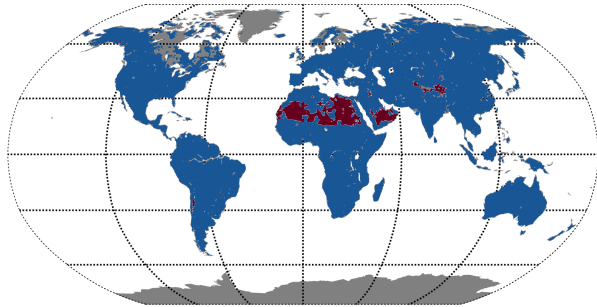

(a) WindSat

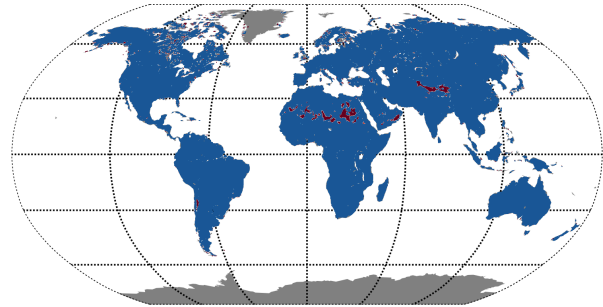

(b) AMSR2

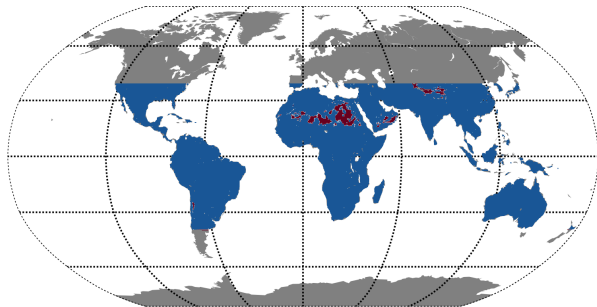

(c) TMI

**Figure 8.** X-band data loss due to failed CDF matching

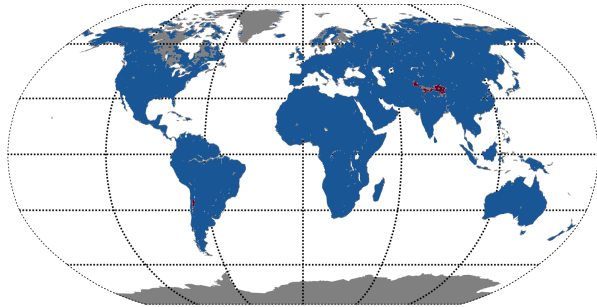

(a) WindSat

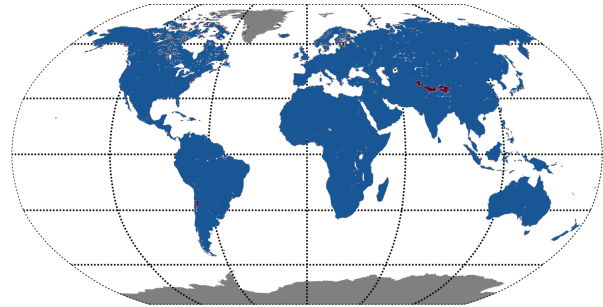

(b) AMSR2

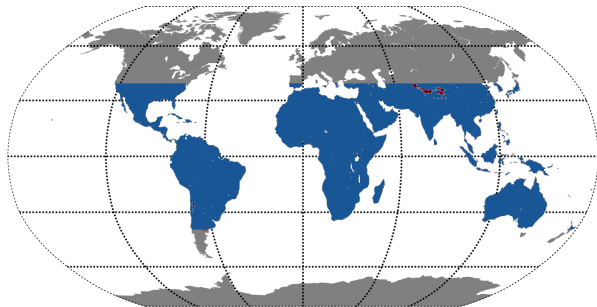

(c) TMI

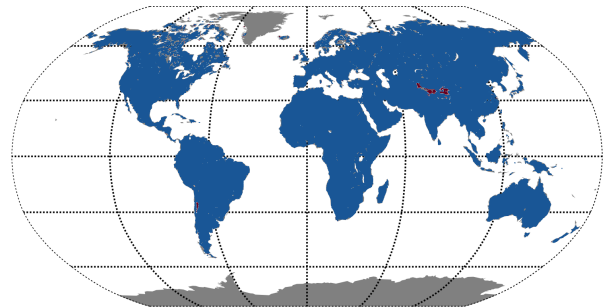

(d) SSM/I

**Figure 9.** Ku-band data loss due to failed CDF matching
